# Supplementary material for: Millisecond autothermal steam reforming of cellulose for synthetic biofuels by reactive flash volatilization
Source: Royal Society of Chemistry journal article supplement (doi:10.1039/b804691c), 2008-01-01
Supplement: b804691c.pdf [file b804691c.pdf]

## Supplementary Material:

# Millisecond Autothermal Steam Reforming of Cellulose for Synthetic Biofuels by Reactive Flash Volatilization

Joshua L. Colby, Paul J. Dauenhauer<sup>\*</sup> and Lanny D. Schmidt<sup>a</sup>

The supplementary material contains a description of the assumptions that went into the construction of figure 7.

### Construction of Figure 7

The development of Figure 7 required the review of several gasification publications and the selection of processing parameters with the goal of comparing several technologies. Due to the heterogeneous feed used in gasification, the two operating criteria selected for comparison were the carbon mass velocity and the carbon space velocity.

The molar flow rate of carbon has been selected as the processing parameter for comparison for several reasons. The heterogeneous feedstock (air/oxygen and solid material such as biomass) of most gasifiers permits a wide range of total mass feed rate depending on parameters such as the C/O ratio of the solid, the S/C ratio of the gasifier feed, and equivalence ratio of the gasifier. However, the molar flow rate of atomic carbon is the common parameter to which many of these factors are related.

The carbon mass velocity (CMV) has been defined,

$$CMV = \frac{Mass\ Flow\ C}{Mass\ Catalyst} \quad (S1).$$

The carbon space velocity (CSV) has been defined,

$$CSV = \frac{Molar\ Flow\ C}{Reaction\ Volume} \quad (S2).$$

The “reaction volume” is considered to be the volume necessary to complete the reaction chemistry for the conversion of biomass/cellulose to synthesis gas. Because the strict definition varies by reactor type, the reaction volume will be carefully defined for each technology.

The considered technologies include 1.) fluidized bed gasifiers followed by catalytic tar cleaning, 2.) integrated catalytic fluidized beds, 3.) fluidized bed fast pyrolysis reactors and steam reforming of fast pyrolysis oils to synthesis gas, and 4.) reactive flash volatilization of cellulose.

Each of these technologies can be operated over a wide range of process parameters. Therefore, experimental trials were selected from publications that both exhibited optimal performance (low selectivity to tars) and high throughput.

Technologies that require two separate reactors (sets 1 and 3) were reported from one publication if possible. Additionally, multiple catalytic metals including dolomite, rhodium, nickel, and ruthenium were considered, because these catalysts were well-represented in the gasification literature.

Figure S1 and Figure 7 show the results of considering the process parameters for all of these considered technologies grouped by type.

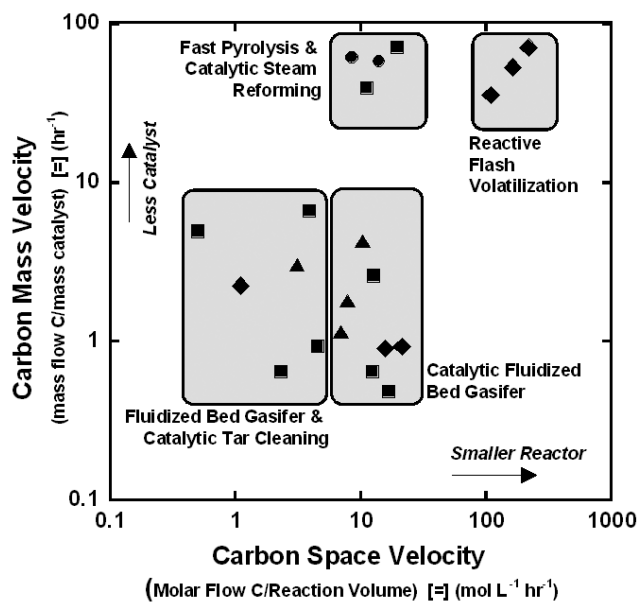

**Figure S1.** Various processes to convert organic solids to synthesis gas exhibit operational performance grouped by process type despite utilizing several different catalysts: Dolomite (▲), Ni (■), Rh (◆), Ru (●). The carbon space velocity provides a measure of the reactor volume by relating the molar processing of carbon to the volume necessary for chemical conversion. The carbon mass velocity provides a measure of catalyst usage by relating the molar processing of carbon to the mass of the catalyst.

#### A. Data and Information for Fluidized Bed Gasifiers and Catalytic Tar Cleaning

**Table S1. Tabulated process parameters for fluidized bed gasifiers and catalytic tar cleaning.**

| Publication                              | [10]   | [15,18] | [8]     | [16]   | [17]                   | [19]                   |
|------------------------------------------|--------|---------|---------|--------|------------------------|------------------------|
| Feed Solid Material (g/hr)               | 9      | 3.6     | 840     | 450    | 470                    | 5000                   |
| Flow Carbon (g/hr)                       | 4.139  | 1.683   | 422.52  | 193.5  | 177.3                  | 2300                   |
| Flow Carbon (mole/hr)                    | 0.345  | 0.140   | 35.2100 | 16.125 | 14.78                  | 191.7                  |
| Catalyst Type                            | Rh     | Ni      | Ni      | NiO-Mg | Dolomite / Ni          | Dolomite               |
| All catalyst loading (g)                 | 1.837  | 0.34    | 650     | 29     | 190.0                  | 752                    |
| Reaction Volume (mL)                     | 300    | 300     | 15260   | 4116   | 3313                   | 61700                  |
| Temperature (deg C)                      | 650    | 650     | 750     | 780    | 700                    | 840                    |
| Gasifying Medium                         | Oxygen | Oxygen  | Steam   | Steam  | Steam / O <sub>2</sub> | Steam / O <sub>2</sub> |
| Carbon Space Velocity (mole/hr L)        | 1.1    | 0.5     | 2.3     | 3.9    | 4.5                    | 3.1                    |
| Carbon Mass Velocity (hr <sup>-1</sup> ) | 2.253  | 4.951   | 0.650   | 6.673  | 0.933                  | 3.059                  |

The solid material for all cases was either wood or microcrystalline cellulose. The flow of carbon was determined based on the feedstock analysis of each publication. The total mass of catalyst loading does not include supports such as alumina or silica. The reaction volume for this technology was the sum of the gasifier total volume and the volume occupied by the tar cleaning catalyst (including void space between catalyst particles).

## B. Data and Information for Catalytic Fluidized Bed Gasifiers

**Table S2. Tabulated process parameters for catalytic fluidized bed gasifiers.**

| Publication                              | [2,3]  | [4]    | [5]    | [8]    | [15]  | [11]     | [12]     | [13]     |
|------------------------------------------|--------|--------|--------|--------|-------|----------|----------|----------|
| Feed Solid Material (g/hr)               | 18.6   | 5.1    | 3.6    | 840    | 10.76 | 602      | 10550    | 9400     |
| Flow Carbon (g/hr)                       | 8.923  | 2.264  | 1.656  | 422.52 | 5.19  | 308.6    | 5275     | 4700     |
| Flow Carbon (mole/hr)                    | 0.7436 | 0.1887 | 0.1380 | 35.21  | 0.433 | 25.71    | 439.6    | 391.7    |
| Catalyst Type                            | Ni     | Rh     | Rh     | Ni     | Ni-Mg | Dolomite | Dolomite | Dolomite |
| All catalyst loading (g)                 | 18.23  | 2.437  | 1.837  | 650    | 2.0   | 72       | 2940     | 4100     |
| Reaction Volume (cc)                     | 44.5   | 8.84   | 8.84   | 2867   | 34.39 | 2490     | 56500    | 56500    |
| Temperature (deg C)                      | 700    | 650    | 700    | 750    | 700   | 800      | 816      | 834      |
| Gasifying Medium                         | Steam  | Oxygen | Oxygen | Steam  | Steam | Oxygen   | Oxygen   | Oxygen   |
| Carbon Space Velocity (mole/hr L)        | 16.7   | 21.3   | 15.6   | 12.3   | 12.6  | 10.3     | 7.8      | 6.9      |
| Carbon Mass Velocity (hr <sup>-1</sup> ) | 0.489  | 0.929  | 0.901  | 0.65   | 2.597 | 4.286    | 1.794    | 1.146    |

The solid material for all cases was either wood or microcrystalline cellulose. The flow of carbon was determined based on the feedstock analysis of each publication. The total mass of catalyst loading does not include supports such as alumina or silica. The reaction volume for catalytic fluidized bed gasifiers was defined as the volume occupied by the catalyst but does not include reactor volume not occupied by the catalyst such as freeboard.

## C. Data and Information for Fast Pyrolysis and Catalytic Steam Reforming

**Table S3. Tabulated process parameters for fast pyrolysis and catalytic steam reforming.**

| Publication                              | [20,21] | [3,22] | [3,21] | [20,22] |
|------------------------------------------|---------|--------|--------|---------|
| Feed Solid Material (g/hr)               | 1970    | 15     | 15     | 1970    |
| Flow Carbon (g/hr)                       | 888.6   | 5.805  | 5.805  | 888.6   |
| Flow Carbon (mole/hr)                    | 74.05   | 0.484  | 0.4840 | 74.05   |
| Catalyst Type                            | Ni      | Ru     | Ru     | Ru      |
| All catalyst loading (g)                 | 12.44   | 0.094  | 0.146  | 15.3    |
| Reaction Volume (mL)                     | 3770    | 56.98  | 43.5   | 5350    |
| Temperature (deg C)                      | 825     | 800    | 800    | 825     |
| Gasifying Medium                         | Steam   | Steam  | Steam  | Steam   |
| Carbon Space Velocity (mole/hr L)        | 19.6    | 8.5    | 11.1   | 13.8    |
| Carbon Mass Velocity (hr <sup>-1</sup> ) | 71.43   | 61.56  | 39.76  | 58.07   |

The solid material for all cases was either wood or microcrystalline cellulose. The two separate reactors in each publication was scaled by the mass flow rate. The flow of carbon was determined based on the feedstock analysis of each publication. The total mass of catalyst loading does not include supports such as alumina or silica. The reaction volume for fast pyrolysis and catalytic steam reforming was defined as the sum of the volume occupied by the fast pyrolysis reactor tube and the volume occupied by the steam reforming catalyst (including void space between catalyst particles).

#### D. Data and Information for Reactive Flash Volatilization

**Table S3. Tabulated process parameters for fast pyrolysis and catalytic steam reforming.**

| Publication                              | [1]    | [1]    | [1]    |
|------------------------------------------|--------|--------|--------|
| Feed Solid Material (g/hr)               | 30     | 40     | 20     |
| Flow Carbon (g/hr)                       | 13.32  | 17.76  | 8.88   |
| Flow Carbon (mole/hr)                    | 1.11   | 1.48   | 0.7400 |
| Catalyst Type                            | Rh     | Rh     | Rh     |
| All catalyst loading (g)                 | 0.25   | 0.25   | 0.25   |
| Reaction Volume (mL)                     | 6.81   | 6.81   | 6.81   |
| Temperature (deg C)                      | 833    | 850    | 750    |
| Gasifying Medium                         | Oxygen | Oxygen | Oxygen |
| Carbon Space Velocity (mole/hr L)        | 163    | 217    | 108.7  |
| Carbon Mass Velocity (hr <sup>-1</sup> ) | 53.28  | 71.04  | 35.52  |

The solid material for all cases was microcrystalline cellulose. The total mass of catalyst loading does not include the support alumina. The reaction volume for reactive flash volatilization reactor was defined as the volume occupied by the catalyst (including void space between catalyst particles) but does not include reactor volume not occupied by the catalyst above and below the fixed bed.

#### References

- [1] P.J. Dauenhauer, B.J. Dreyer, N.J. Degenstein, L.D. Schmidt, "Millisecond reforming of solid biomass for sustainable fuels," *Angewandte Chemie International Edition* **46** (2007) 5864-5867.
- [2] J. Arauzo, D. Radlein, J. Piskorz, D.S. Scott, "A new catalyst for the catalytic gasification of biomass" *Energy & Fuels* **8** (1994) 1192-1196.
- [3] D.S. Scott, J. Piskorz, "The flash pyrolysis of Aspen-Poplar Wood," *Canadian Journal of Chemical Engineering* **60** (1982) 666-674.
- [4] K. Tomishige, M. Asadullah, K. Kunimori, "Syngas production by biomass gasification using Rh/CeO<sub>2</sub>/SiO<sub>2</sub> catalysts and fluidized bed reactor" *Catalysis Today* **89** (2004) 389-403.
- [5] M. Asadullah, T. Miyazawa, S. Ito, K. Kunimori, K. Tomishige, "Demonstration of real biomass gasification drastically promoted by effective catalyst" *Applied Catalysis A: General* **246** (2003) 103-116.
- [8] E.G. Baker, L.K. Mudge, M.D. Brown, "Steam gasification of biomass with nickel secondary catalysts," *Ind. Eng. Chem. Res.* **26** (1987) 1335-1339.
- [10] K. Tomishige, T. Miyazawa, M. Asadullah, S. Ito, K. Kunimori, "Catalyst performance in reforming of tar derived from biomass over noble metal catalysts," *Green Chemistry* **5** (2003) 399-403.
- [11] P. Lv, J. Chang, T. Wang, Y. Fu, Y. Chen, "Hydrogen-rich gas production from biomass catalytic gasification" *Energy & Fuels* **18** (2004) 228-233.
- [12] J. Gil, M. Caballero, J. Martin, M. Aznar, J. Corella, "Biomass gasification with air in a fluidized bed: Effect of the in-bed use of dolomite under different operation conditions," *Ind. Eng. Chem. Res.* **38** (1999) 4226-4235.
- [13] A. Olivares, M. P. Aznar, M.A. Caballero, J. Gil, E. Frances, J. Corella, "Biomass Gasification: Produced Gas Upgrading by In-Bed Use of Dolomite," *Ind. Eng. Chem. Res.* **36** (1997) 5220-5226.
- [15] T. Kimura, T. Miyazawa, J. Nishikawa, S. Kado, K. Okumura, T. Miyao, S. Naito, K. Kunimori, K. Tomishige, "Development of Ni catalysts for tar removal by steam gasification of biomass," *Applied Catalysis B: Environmental* **68** (2006) 160-170.
- [16] M.P. Aznar, J. Corella, J. Delgado, J. Lahoz, "Improved steam gasification of lignocellulosic residues in a fluidized bed with commercial steam reforming catalysts," *Ind. Eng. Chem. Res.* **32** (1993) 1-10.
- [17] P. Lv, Z. Yuan, C. Wu, L. Ma, Y. Chen, N. Tsubaki, "Bio-syngas production from biomass catalytic gasification," *Energy Conversion and Management* **48** (2007) 1132-1139.

- [18] J. Nishikawa, K. Nakamura, M. Asadullah, T. Miyazawa, K. Kunitomi, K. Tomishige, "Catalytic performance of Ni/CeO<sub>2</sub>/Al<sub>2</sub>O<sub>3</sub> modified with noble metals in steam gasification of biomass," *Catalysis Today* **131** (2008) 146-155.
- [19] P. Perez, P.M. Aznar, M.A. Caballero, J. Gil, J.A. Martín, J. Corella, "Hot Gas Cleaning and Upgrading with a Calcined Dolomite Located Downstream a Biomass Fluidized Bed Gasifier Operating with Steam-Oxygen Mixtures" *Energy & Fuels* **11** (1997) 1194-1203.
- [20] D.S. Scott, J. Piskorz, "The Continuous Flash Pyrolysis of Biomass" *Canadian Journal of Chemical Engineering* **62** (1994) 404-412.
- [21] L. García, R. French, S. Czernik, E. Chornet, "Catalytic steam reforming of bio-oils for the production of hydrogen: effects of catalyst composition," *Applied Catalysis A: General* **201** (2000) 225-239.
- [22] A.C. Basagiannis, X.E. Verykios, "Steam reforming of the aqueous fraction of bio-oil over structured Ru/MgO/Al<sub>2</sub>O<sub>3</sub> catalysts," *Catalysis Today* **127** (2007) 256-264.
